# Supplementary material for: An ATMND/SGI based three-way junction ratiometric fluorescent probe for rapid and sensitive detection of bleomycin
Source: Royal Society of Chemistry journal article supplement (doi:10.1039/d3an02186f), 2024-01-01
Supplement: d3an02186f1.pdf [file d3an02186f1.pdf]

***Electronic Supplementary Material***

**An ATMND/SGI based three-way junction ratiometric fluorescence  
probe for rapid and sensitive detection of bleomycin**

Rong-Mei Kong\*, Xue Han, Peihua Li, Yan Zhao, Weiheng Kong, Mei-Hao Xiang,  
Lian Xia, Fengli Qu

*Key Laboratory of Life-Organic Analysis of Shandong Province, School of Chemistry  
and Chemical Engineering, Qufu Normal University, Qufu Shandong 273165, P. R.  
China.*

\* To whom correspondence should be addressed.

E-mail: [kongrongmei@126.com](mailto:kongrongmei@126.com)

Tel/fax: (+86) 537-4456301

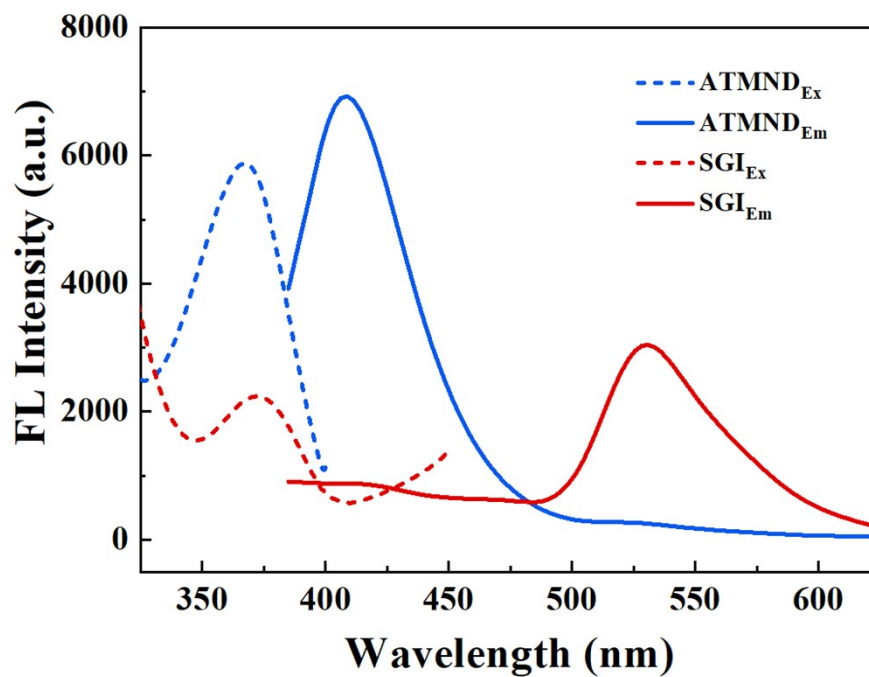

**Fig. S1** The fluorescence excitation and emission spectra of ATMND and SGI. Concentrations:

[ATMND] = 125 nM, [SGI] = 0.35 ×, [D6] = 1 μM.

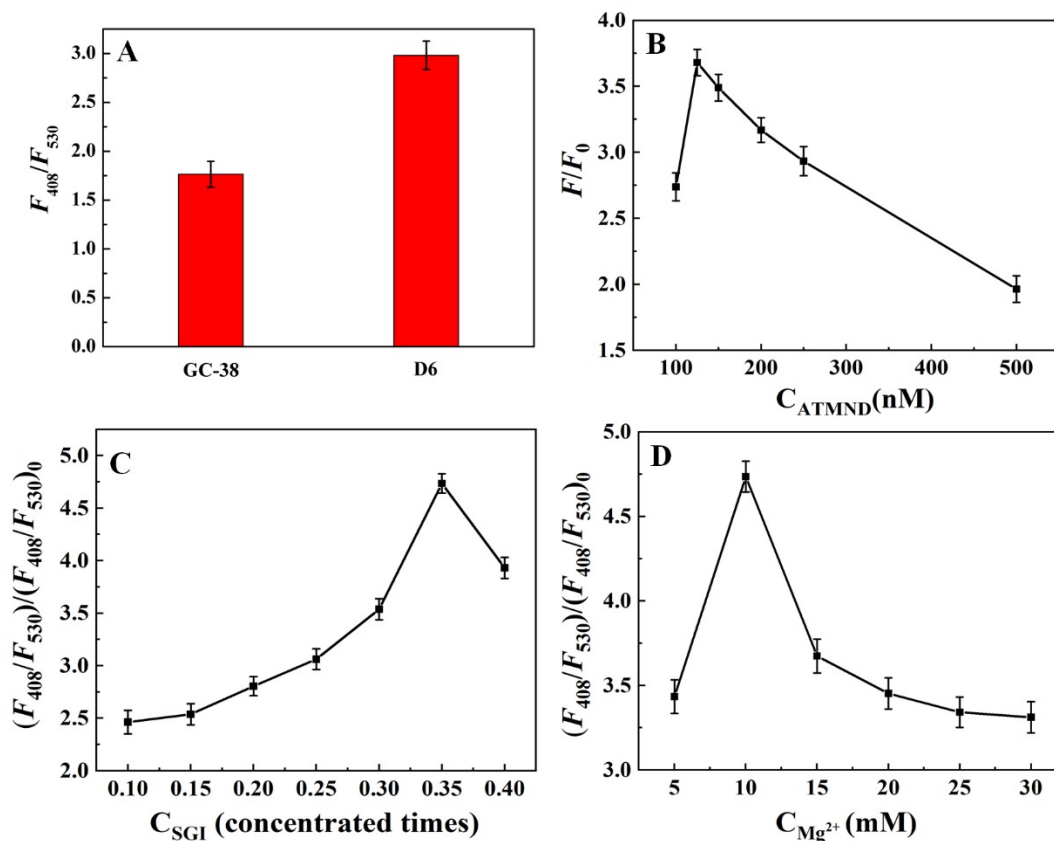

**Fig. S2** (A) Comparison of ratiometric fluorescence detection performance towards BLM between GC-38 and D6 sequence. (B) The fluorescence quenching ability of D6 sequence on ATMND with different concentrations, where  $F_0$  and  $F$  are the fluorescence intensity of ATMND with and without D6 sequence, respectively. The effect of SGI (C) and (D)  $\text{Mg}^{2+}$  concentrations on the ratiometric fluorescence detection performance of D6-ATMND/SGI system towards BLM, where  $(F_{408}/F_{530})$  and  $(F_{408}/F_{530})_0$  are the fluorescence ratio in the presence and absence of BLM. Concentrations:  $[\text{ATMND}] = 125 \text{ nM}$ ,  $[\text{SGI}] = 0.35 \times$ ,  $[\text{D6}] = 1 \mu\text{M}$ ,  $[\text{BLM-Fe(II)}] = 800 \text{ nM}$ .

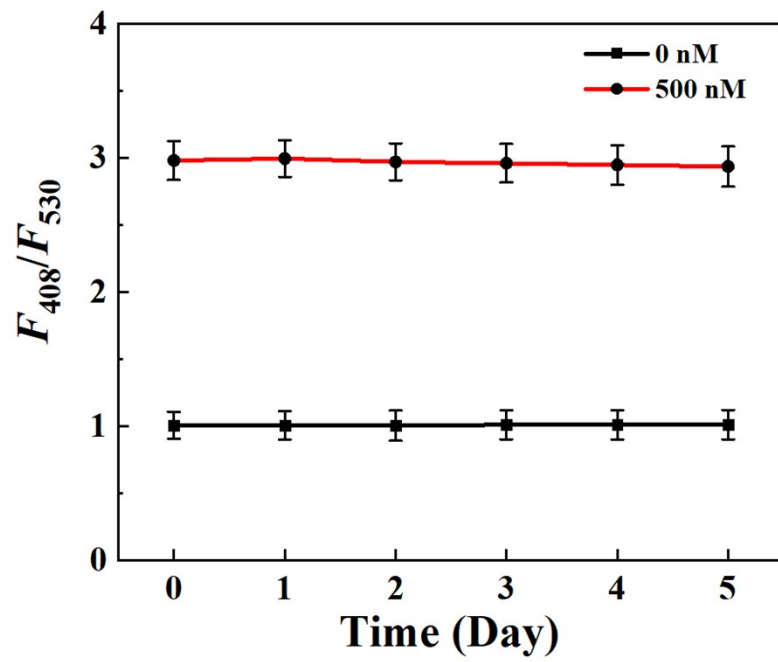

**Fig. S3.** The stability investigation of D6-ATMND/SGI within 5 days for the detection of BLM.

**Table S1.** Comparison of different fluorescent probes for the detection of BLM.

| Probe                           | Signal      | Linear range<br>(nM) | Detection<br>limit (nM) | Total time | Ref.      |
|---------------------------------|-------------|----------------------|-------------------------|------------|-----------|
| FAM-labeled ssDNA               | Turn-on     | 0.5-1000             | 0.3                     | 23 min     | 1         |
| FAM-labeled ssDNA               | Turn-on     | 5.0-1000             | 0.2                     | 30 min     | 2         |
| GQDs                            | Turn-on     | 0.5-1000             | 0.2                     | 26 h       | 3         |
| G4-NMM                          | Turn-on     | 2-220                | 0.34                    | 200 min    | 4         |
| G4-NMM/Cu <sup>2+</sup>         | Turn-on     | 0.1-75               | 0.1                     | 65 min     | 5         |
| N-GQDs/ssDNA                    | Turn-on     | 0.34-1300            | 0.34                    | 15 min     | 6         |
| DNA-CuNCs                       | Turn-off    | 500-1600             | 270                     | 5 min      | 7         |
| DNA-AgNCs                       | Ratiometric | 0.2-1000             | 0.067                   | 280 min    | 8         |
| GQDs@AuNCs                      | Ratiometric | 0.8-1800             | 0.27                    | 42 h       | 9         |
| Cu <sup>2+</sup> -AA-OPD system | Ratiometric | 0.1-300              | 0.05                    | 135 min    | 10        |
| D6-ATMND/SGI                    | Ratiometric | 0.5-1000             | 0.2                     | 30 min     | this work |

## References

- [1] Y. Qin, Y. Ma, X. Jin, L. Zhang, G. Ye and S. Zhao, *Anal. Chim. Acta*, 2015, **866**, 84-89.
- [2] F. Li, Y. Feng, C. Zhao, P. Li and B. Tang, *Chem. Commun.*, 2012, **48**, 127.
- [3] H. M. Pei, Y. Q. Zheng, R. M. Kong, L. Xia and F. L. Qu, *Biosens. Bioelectron.*, 2016, **85**, 76.
- [4] H. Wang, W. Jiang, W. Li and L. Wang, *Sensor. Actuat. B-Chem.*, 2017, **238**, 318-324.
- [5] L. Qin, B. Feng, Q. Luo, Z. Zeng, P. Zhang, X. Ye and T. Qing, *Spectrochim. Acta Part A*, 2022, **267**, 120572.
- [6] X. Liu, W. Na, Q. Liu and X. Su, *Anal. Chim. Acta*, 2018, **1028**, 45-49.
- [7] P. Li, Z. Xie, L. Zhuang, L. Deng and J. Huang, *Int. J. Biol. Macromol.*, 2023, **234**, 123756.
- [8] S. Y. Zhu, L. Y. Liu, J. Sun, F. J. Shi and X. E. Zhao, *Spectrochim. Acta Part A*, 2021, **252**, 119521.
- [9] D.D. Su, M.K. Wang, Q. Liu, J.Y. Chen and X.G. Su, *Sens. Actuat. B-Chem.*, 2019, **290**, 163.
- [10] F. Guo, M. Xia, J. Sun and S. Zhu, *New J. Chem.*, 2021, **45**, 13620-13625.
